# Supplementary material
Source: PubMed Central journal article supplement (PMC7737318)
Supplement: pt0c00139_si_001.pdf [file pt0c00139_si_001.pdf]

## Supplementary Information

**Vaccine formulation and optimization for Human Herpes virus-5 through immunoinformatics framework**

**Neeraj Kumar<sup>1\*</sup>, Damini Sood<sup>1</sup>, Ramesh Chandra<sup>1\*</sup>**

<sup>1</sup>Department of Chemistry, University of Delhi, Delhi 110007, India

**\*Corresponding author:**

Dr. Neeraj Kumar,

Department of Chemistry, University of Delhi, Delhi- 110007, India

Email id: [nan.neeraj@gmail.com](mailto:nan.neeraj@gmail.com)

Prof. Ramesh Chandra,

Department of Chemistry, University of Delhi, Delhi- 110007, India

Email: [rameshchandra@gmail.com](mailto:rameshchandra@gmail.com)

## **Table of Contents**

|                                                                                                                                                                                                                                                                                       |                |
|---------------------------------------------------------------------------------------------------------------------------------------------------------------------------------------------------------------------------------------------------------------------------------------|----------------|
| Protein sequence of multi epitope vaccine construct                                                                                                                                                                                                                                   | <b>Page S3</b> |
| Relevant Linkers used for construction of vaccine construct                                                                                                                                                                                                                           | <b>Page S3</b> |
| Figure S1: (A) The 3D structure of MHC-1 (B) The Ramachandran plot of MHC-1 (C) The 3D structure of MHC-2 (D) The Ramachandran plot of MHC-2 (E) The 3D structure of TLR-2 receptor (F) The Ramachandran plot of TLR-2.                                                               | <b>Page S4</b> |
| Figure S2: (A) Secondary structure element analysis of vaccine in singlet state (B) Residue content fluctuation plot of secondary structural elements of Vaccine.                                                                                                                     | <b>Page S5</b> |
| Figure S3: (A) Secondary structure element analysis of TLR2 receptor (B) Residue content fluctuation plot of secondary structural elements of TLR2 receptor.                                                                                                                          | <b>Page S5</b> |
| Figure S4: Residue content fluctuation of Secondary structure element analysis of TLR2 receptor for 100 ns molecular dynamics simulation run.                                                                                                                                         | <b>Page S6</b> |
| Figure S5: Residue content fluctuation of Secondary structure element analysis of vaccine construct for 100 ns molecular dynamics simulation run.                                                                                                                                     | <b>Page S7</b> |
| Figure S6: Predicted immune response (A) Elevation of regulatory T-cell populations at different concentration of antigen, resting and active state (B) Natural Killer cell count (C) Cytokines and dendritic cells populations (D) Dendritic cell population in response to vaccine. | <b>Page S8</b> |

### **Protein sequence of multi epitope vaccine construct**

EAAAKMTPQNITDLCAEYHNTQIYTLNDKIFSYTESLAGKREMAITFKNGAIFQVEV  
PGSQHIDSQKKAIERMKDTLRIA YL TEAKVEKLCVWNNKTPHAIAAISMANGTEAAA  
KAA YNDIISDISGFNSSVITYPDAQLVPGINGKAIHLVNNEAAYIEYNDMFNNFTVSF  
WLRVPKVSASHLEQYGTAAYLRVGYNAPGIPLYKKMEAVKLRDLKGPGPGSTVDS  
MIALGPGPGKRNIVAHTFGPGPGNPSAILS AIGPGPGAAYNLFPYLVSAAYYYIYSTY  
LLGAAYY EYVDYLFKAAYKKVGVAIGAVGGAVKKRKGPGPPSSDASKKKRSTNNT  
TTLSLKKRVYQKVLTFHEYGAEALERAGKVVDPLPPYHEYGAEALERAGRLRHRKN  
GYHEYGAEALERAG.

### **Relevant Linkers used for construction of vaccine construct**

CTL epitopes - AAY linker, HTLs, TTFrC - GPGPG linker, B-cell epitopes -KK linker, and CTB adjuvant -EAAAK linkers”.

### Three- dimensional structure assessment of MHC-1, MHC-2 and TLR2

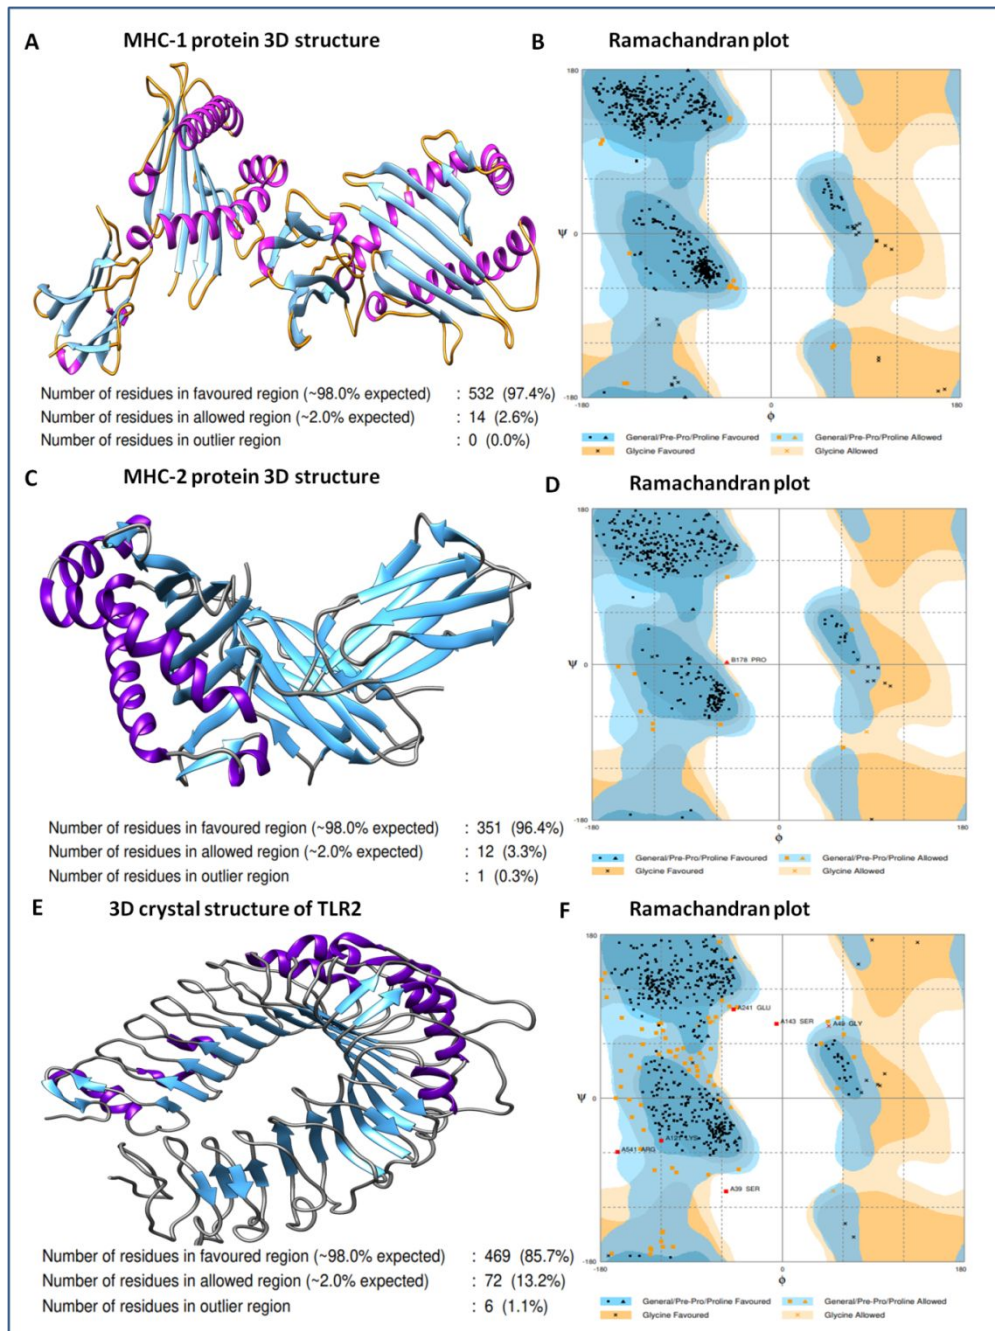

**Figure S1:** (A) The 3D structure of MHC-1 (B) The Ramachandran plot of MHC-1 (C) The 3D structure of MHC-2 (D) The Ramachandran plot of MHC-2 (E) The 3D structure of TLR-2 receptor (F) The Ramachandran plot of TLR-2.

## Molecular dynamics simulation analyses results for Secondary structure element analysis

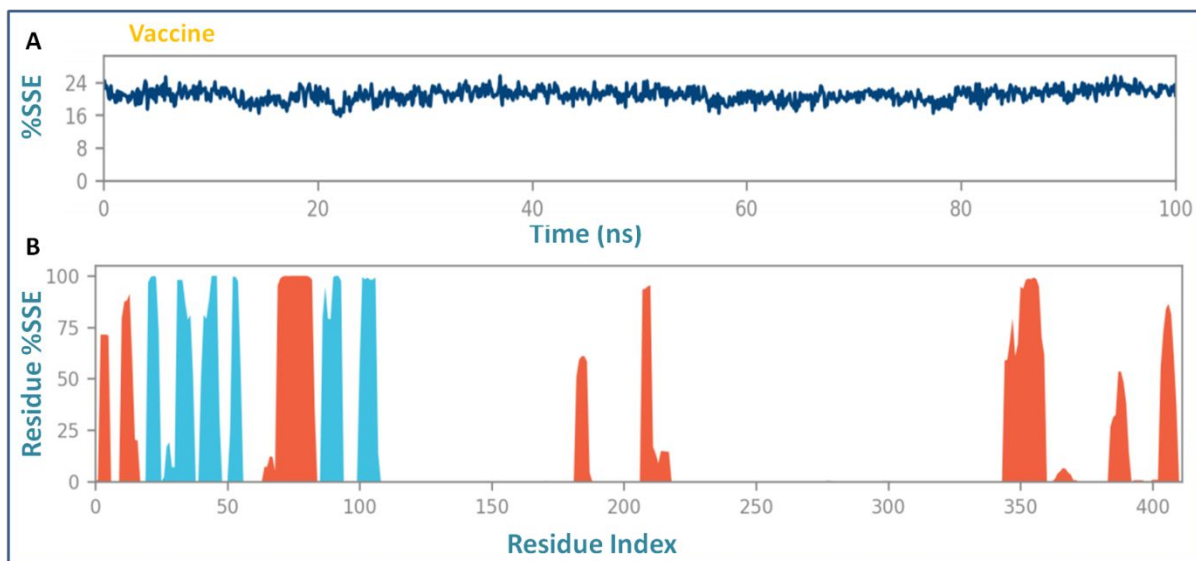

**Figure S2:** (A) Secondary structure element analysis of vaccine in singlet state (B) Residue content fluctuation plot of secondary structural elements of Vaccine.

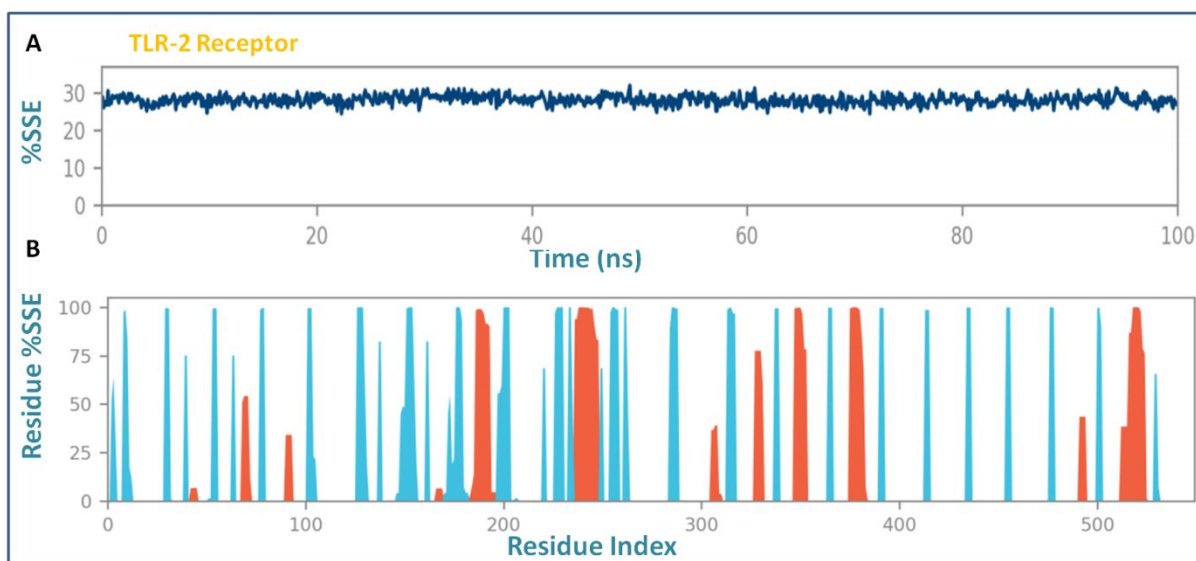

**Figure S3:** (A) Secondary structure element analysis of TLR2 receptor (B) Residue content fluctuation plot of secondary structural elements of TLR2 receptor.

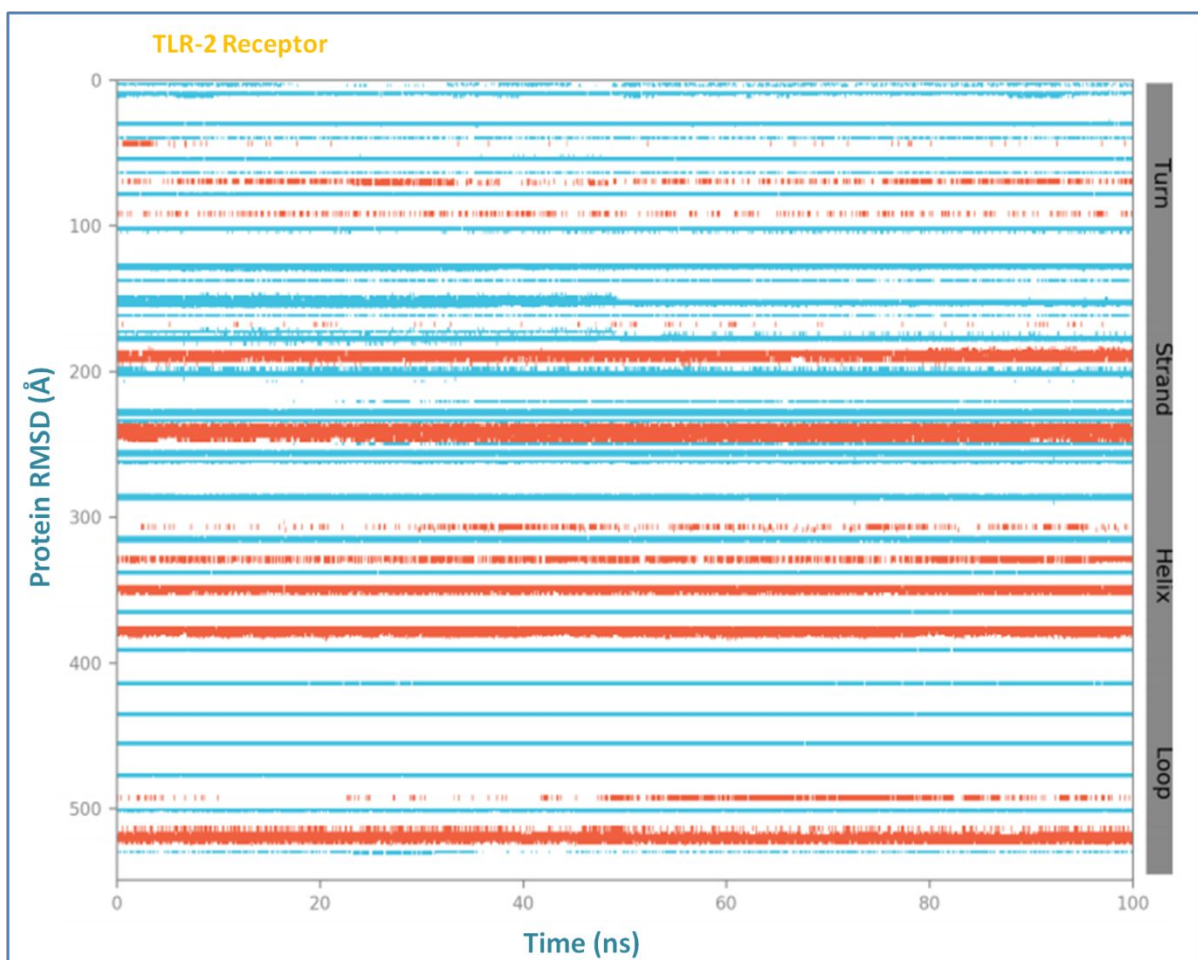

**Figure S4:** Residue content fluctuation of Secondary structure element analysis of TLR2 receptor for 100 ns molecular dynamics simulation run.

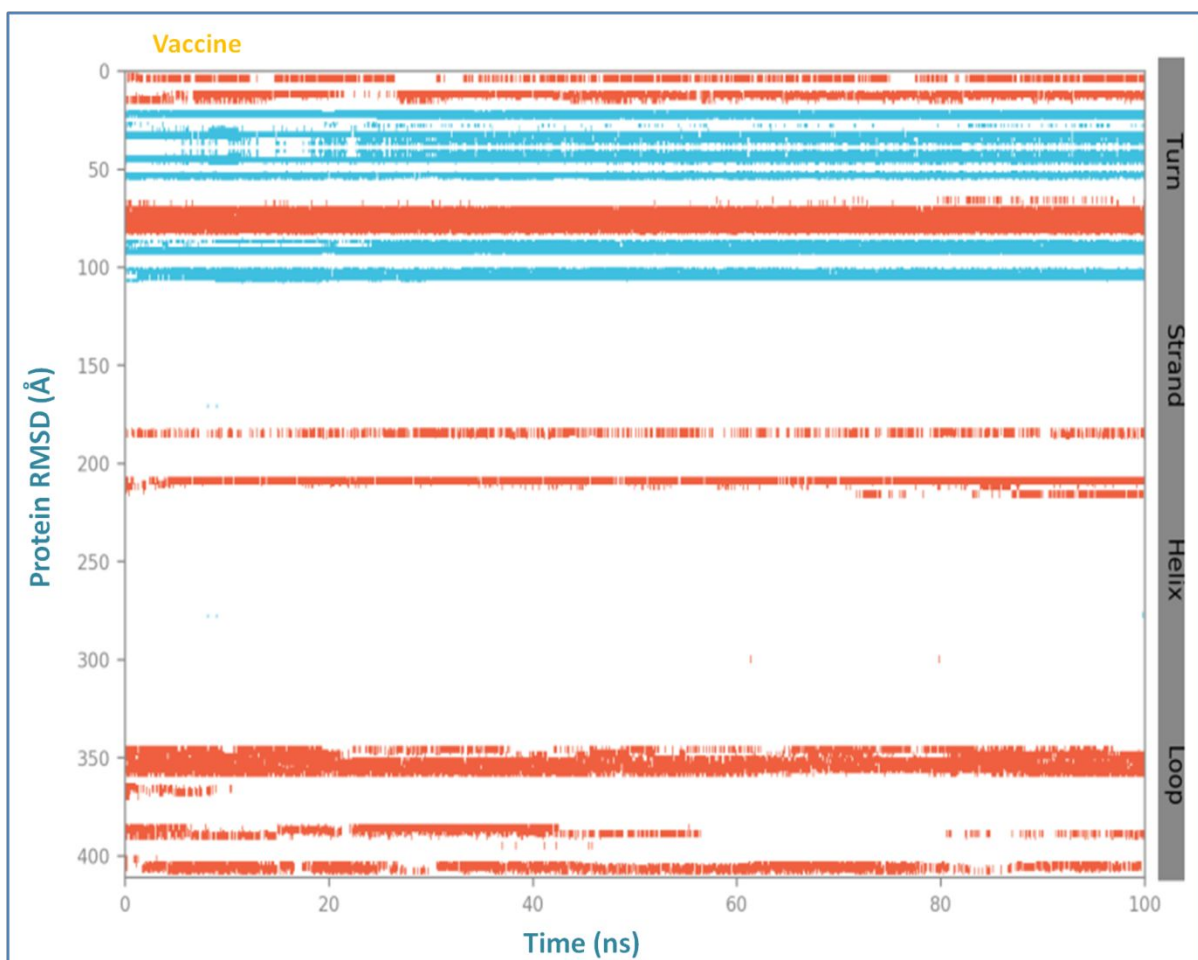

**Figure S5:** Residue content fluctuation of Secondary structure element analysis of vaccine construct for 100 ns molecular dynamics simulation run.



## *In silico* immune response results for vaccine

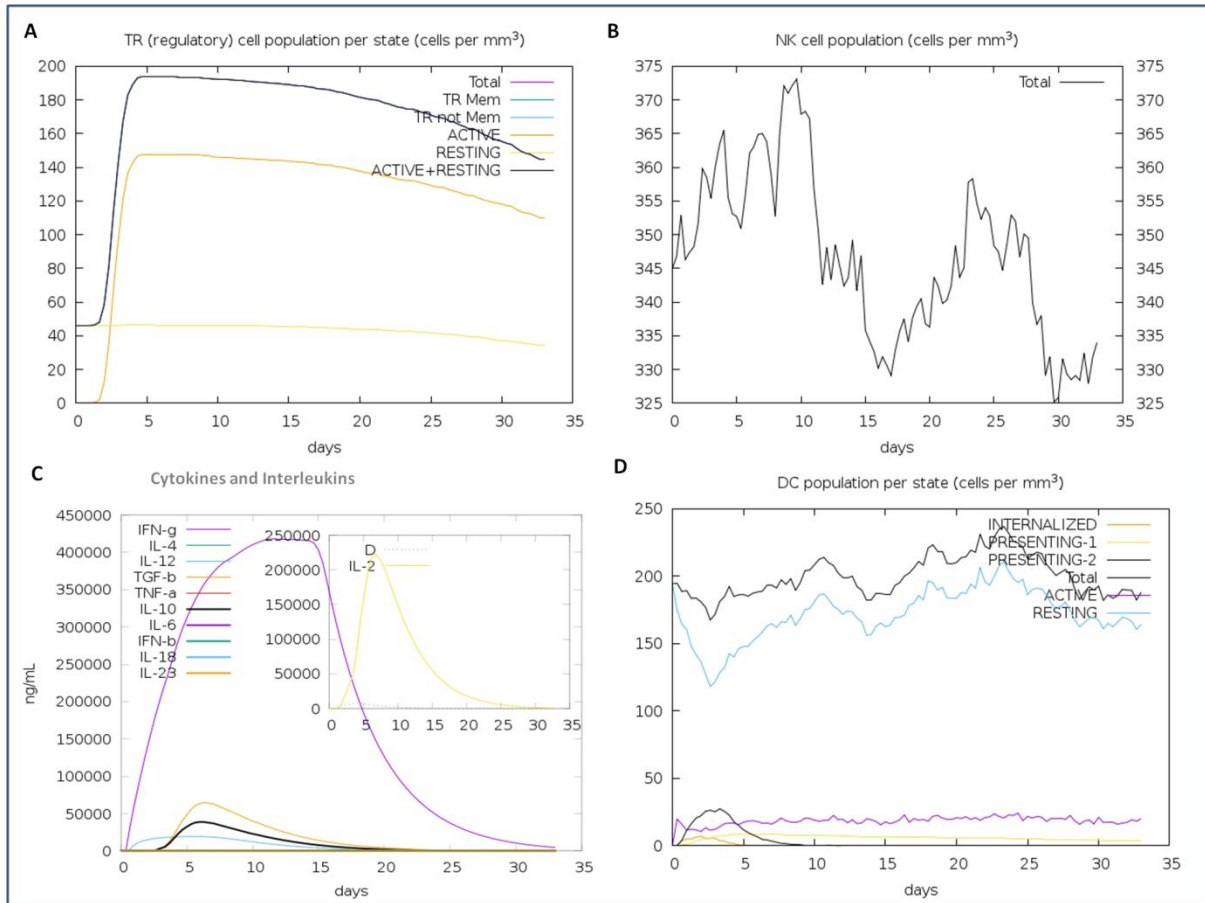

**Figure S6:** Predicted immune response (A) Elevation of regulatory T-cell populations at different concentration of antigen, resting and active state (B) Natural Killer cell count (C) Cytokines and dendritic cells populations (D) Dendritic cell population in response to vaccine.
